# Supplementary material for: Variation in haemodynamic monitoring for major surgery in European nations: secondary analysis of the EuSOS dataset
Source: PubMed Central journal article supplement (PMC4581514; doi:10.1186/s13741-015-0018-8), 2015-09-23
Supplement: 13741_2015_18_MOESM1_ESM.pdf [file 13741_2015_18_MOESM1_ESM.pdf]

**Variation in haemodynamic monitoring for major surgery in  
European nations: secondary analysis of the EuSOS dataset**

**Supplemental Digital Content**

**\*Tahania Ahmad, \*Christian M. Beilstein, Cesar Aldecoa,  
Rui P. Moreno, Zsolt Molnár, Vesna Novak-Jankovic,  
Christoph K. Hofer, Michael Sander, Andrew Rhodes and  
Rupert M. Pearse**

**\*authors made an equal contribution to the submitted work**

**Supplementary Figure 1: Patient flow diagram**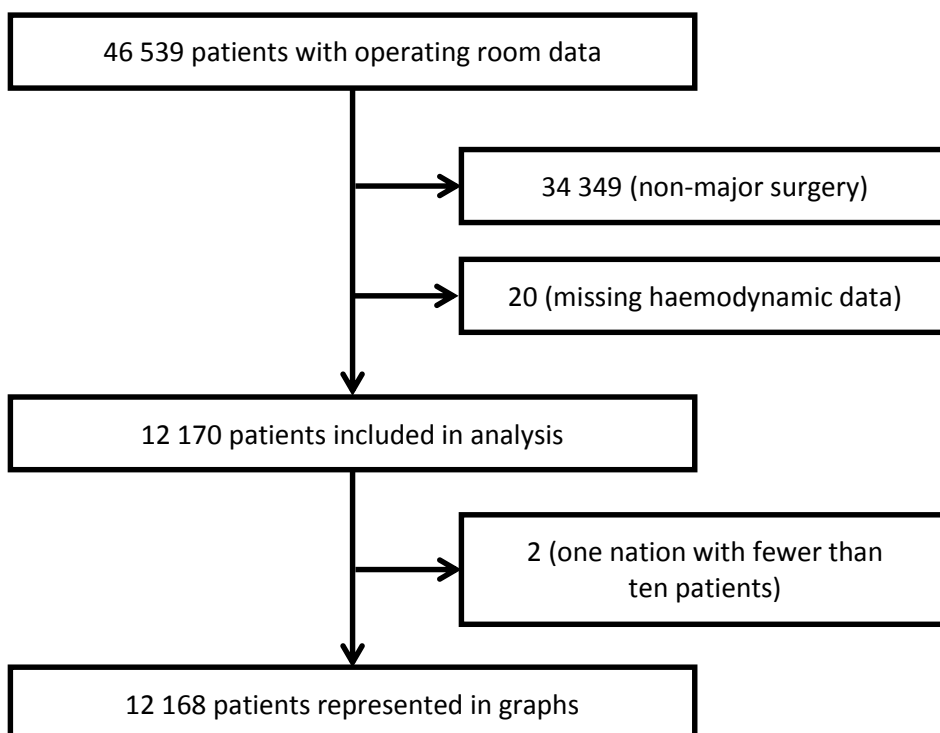

## Supplementary Figure 2: Variation in use of different types of cardiac output monitoring in European nations

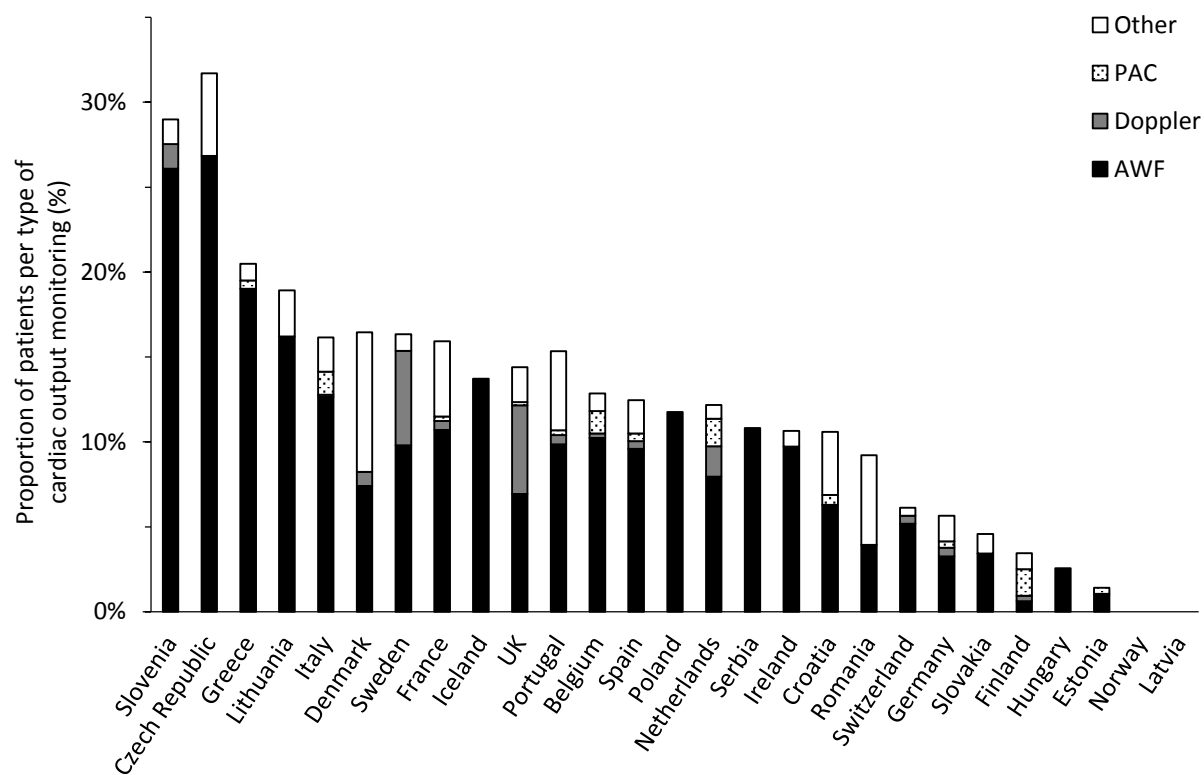

Data are presented in % per type of COM used per nation. Only nations with more than 10 recruited patients were included into this graph. Note that the use of multiple types of COM per patient was possible. PAC, pulmonary artery catheter; Doppler, Doppler ultrasound; AWF, arterial wave form analysis; UK, United Kingdom.

**Supplementary Table: Types of haemodynamic monitoring used in European nations**

| <b>Nation</b>  | <b>N</b> | <b>AWF</b> | <b>Doppler</b> | <b>PAC</b> | <b>Other</b> | <b>Total COM</b> | <b>CVC</b>  |
|----------------|----------|------------|----------------|------------|--------------|------------------|-------------|
| Belgium        | 381      | 39 (10.2)  | 1 (0.3)        | 5 (1.3)    | 4 (1.0)      | 48 (12.6)        | 84 (22.0)   |
| Croatia        | 349      | 22 (6.3)   | 0 (0.0)        | 2 (0.6)    | 13 (3.7)     | 36 (10.3)        | 64 (18.3)   |
| Cyprus         | 2        | 1 (50.0)   | 0 (0.0)        | 0 (0.0)    | 1 (50.0)     | 2 (100.0)        | 2 (100.0)   |
| Czech Republic | 41       | 11 (26.8)  | 0 (0.0)        | 0 (0.0)    | 2 (4.9)      | 11 (26.8)        | 14 (34.1)   |
| Denmark        | 243      | 18 (7.4)   | 2 (0.8)        | 0 (0.0)    | 20 (8.2)     | 36 (14.8)        | 22 (9.1)    |
| Estonia        | 283      | 3 (1.1)    | 0 (0.0)        | 1 (0.4)    | 0 (0.0)      | 4 (1.4)          | 24 (8.5)    |
| Finland        | 318      | 2 (0.6)    | 1 (0.3)        | 5 (1.6)    | 3 (0.9)      | 11 (3.5)         | 38 (11.9)   |
| France         | 383      | 41 (10.7)  | 2 (0.5)        | 1 (0.3)    | 17 (4.4)     | 55 (14.4)        | 76 (19.8)   |
| Germany        | 797      | 26 (3.3)   | 4 (0.5)        | 3 (0.4)    | 12 (1.5)     | 42 (5.3)         | 333 (41.8)  |
| Greece         | 405      | 77 (19.0)  | 0 (0.0)        | 2 (0.5)    | 4 (1.0)      | 83 (20.5)        | 87 (21.5)   |
| Hungary        | 117      | 3 (2.6)    | 0 (0.0)        | 0 (0.0)    | 0 (0.0)      | 3 (2.6)          | 18 (15.4)   |
| Iceland        | 51       | 7 (13.7)   | 0 (0.0)        | 0 (0.0)    | 0 (0.0)      | 7 (13.7)         | 3 (5.9)     |
| Ireland        | 216      | 21 (9.7)   | 0 (0.0)        | 0 (0.0)    | 2 (0.9)      | 23 (10.6)        | 41 (19.0)   |
| Italy          | 743      | 94 (12.7)  | 1 (0.1)        | 10 (1.3)   | 15 (2.0)     | 112 (15.1)       | 210 (28.3)  |
| Latvia         | 125      | 0 (0.0)    | 0 (0.0)        | 0 (0.0)    | 0 (0.0)      | 0 (0.0)          | 7 (5.6)     |
| Lithuania      | 37       | 6 (16.2)   | 0 (0.0)        | 0 (0.0)    | 1 (2.7)      | 7 (18.9)         | 16 (43.2)   |
| Netherlands    | 616      | 49 (8.0)   | 11 (1.8)       | 10 (1.6)   | 5 (0.8)      | 72 (11.7)        | 74 (11.8)   |
| Norway         | 249      | 0 (0.0)    | 0 (0.0)        | 0 (0.0)    | 0 (0.0)      | 0 (0.0)          | 22 (8.8)    |
| Poland         | 51       | 6 (11.8)   | 0 (0.0)        | 0 (0.0)    | 0 (0.0)      | 6 (11.8)         | 6 (11.8)    |
| Portugal       | 365      | 36 (9.9)   | 2 (0.5)        | 1 (0.3)    | 17 (4.7)     | 49 (13.4)        | 88 (24.1)   |
| Romania        | 228      | 9 (3.9)    | 0 (0.0)        | 0 (0.0)    | 12 (5.3)     | 19 (8.3)         | 34 (20.6)   |
| Serbia         | 37       | 4 (10.8)   | 0 (0.0)        | 0 (0.0)    | 0 (0.0)      | 4 (10.8)         | 3 (8.1)     |
| Slovakia       | 175      | 6 (3.4)    | 0 (0.0)        | 0 (0.0)    | 2 (1.1)      | 8 (4.6)          | 36 (20.6)   |
| Slovenia       | 69       | 18 (26.1)  | 1 (1.4)        | 0 (0.0)    | 1 (1.4)      | 19 (27.5)        | 16 (23.2)   |
| Spain          | 1782     | 171 (9.6)  | 8 (0.4)        | 8 (0.4)    | 35 (2.0)     | 211 (11.8)       | 503 (28.2)  |
| Sweden         | 306      | 30 (9.8)   | 17 (5.6)       | 0 (0.0)    | 3 (1.0)      | 44 (14.4)        | 53 (17.3)   |
| Switzerland    | 212      | 11 (5.2)   | 1 (0.5)        | 0 (0.0)    | 1 (0.5)      | 12 (5.7)         | 27 (12.7)   |
| UK             | 3589     | 249 (6.9)  | 187 (5.2)      | 7 (0.2)    | 74 (2.1)     | 492 (13.7)       | 442 (12.3)  |
| All nations    | 12170    | 960 (7.9)  | 238 (2.0)      | 55 (0.5)   | 244 (2.0)    | 1416 (11.6)      | 2343 (19.3) |

Data are presented in absolute numbers (percentage of patients per nation). Note that multiple types of COM per patient possible. N, number; AWF, arterial wave form analysis; Doppler, Doppler ultrasound; PAC, pulmonary artery catheter; COM, cardiac output monitoring; UK, United Kingdom.
